# Supplementary material for: Structural insights and binding analysis for determining the molecular bases for programmed cell death protein ligand-1 inhibition
Source: Royal Society of Chemistry journal article supplement (doi:10.1039/c9md00326f), 2019-01-01

## **Structural Insights and Binding Analysis for Determining the Molecular Bases for Programmed Cell Death Protein Ligand-1 Inhibition**

Rita C. Acúrcio<sup>a</sup>, Carlota Leonardo-Sousa<sup>a</sup>, Alfonso T. García-Sosa<sup>b</sup>, Jorge A. Salvador<sup>c</sup>, Helena F.  
Florindo<sup>a\*</sup>, Rita C. Guedes<sup>a\*</sup>

<sup>a</sup> Research Institute for Medicines (iMed.Ulisboa), Faculty of Pharmacy, Universidade de Lisboa, 1649-003 Lisbon, Portugal

<sup>b</sup> Institute of Chemistry, University of Tartu, Ravila 14a, 50411 Tartu, Estonia ORCID 0000-0003-0542-4446

<sup>c</sup> Center for Neurosciences and Cell Biology, Universidade de Coimbra, Coimbra, Portugal

\*Corresponding authors:

Helena F. Florindo, [hflorindo@ff.ulisboa.pt](mailto:hflorindo@ff.ulisboa.pt)

Rita C. Guedes, [rguedes@ff.ulisboa.pt](mailto:rguedes@ff.ulisboa.pt)

## **Supplementary Material**

Figure 1 - RMSD analysis of 15 PD-L1 structures from the PDB. Structures of PD-L1 in complex with small-molecule inhibitors are highlighted in the black box. PD-L1 in complex with peptide-based inhibitors highlighted in the grey box. Similar average RMSD values in each cluster. For small-molecule inhibitors and 0.4 Å for peptide-based inhibitors 0.7 Å.

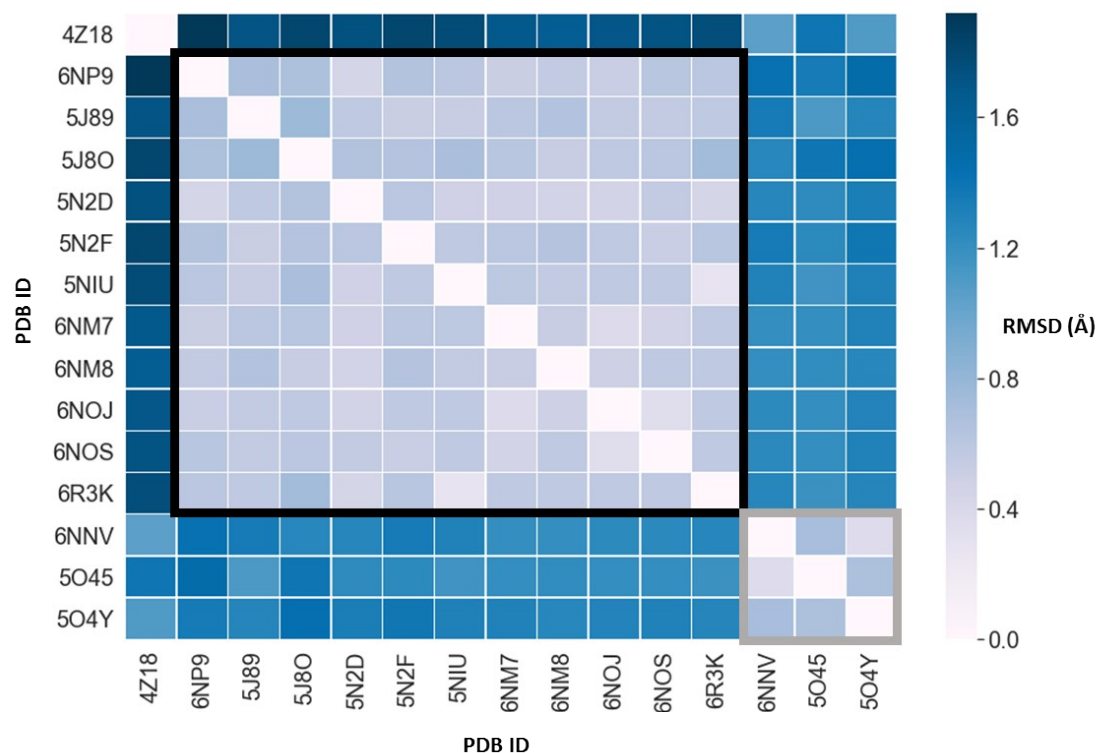

Figure 2 - Ribbon representation of two molecules of PD-L1 (silver) bridged by a small-molecule inhibitor **2** (yellow) (PDBID 5J89). Close-up view of hydrophobic cavity. Receptor-ligand interactions are displayed in dashes. Hydrophobic contacts (yellow),  $\pi$ -stacking (green) and H-bond and salt bridges (red).

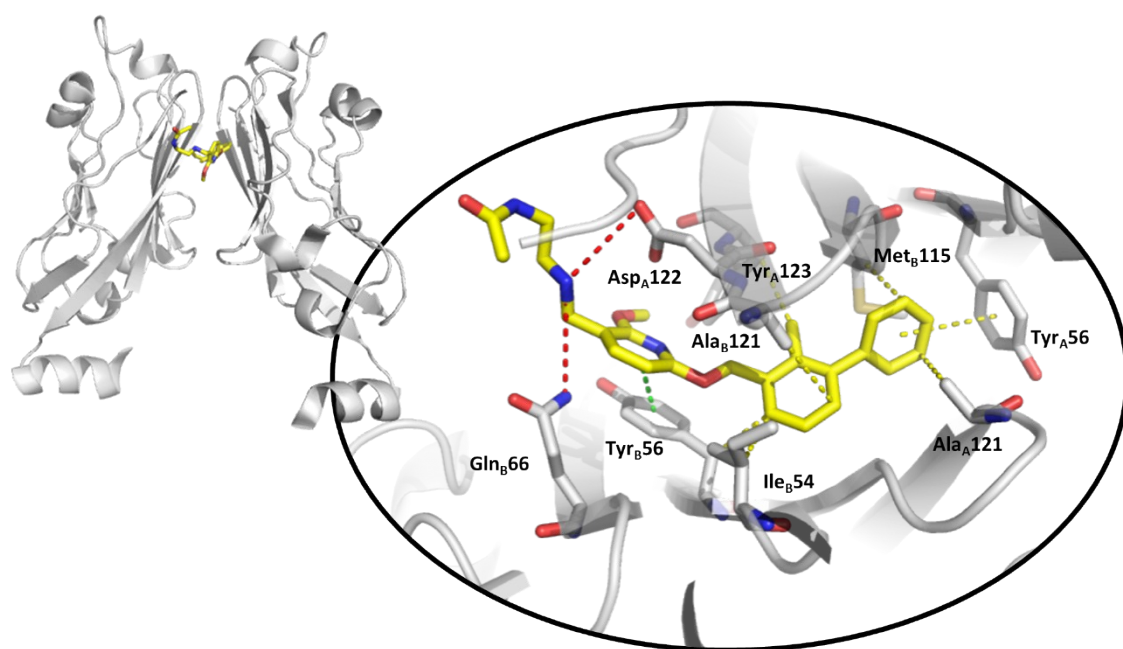

Figure 3 – Tyr<sub>B</sub>56 movement

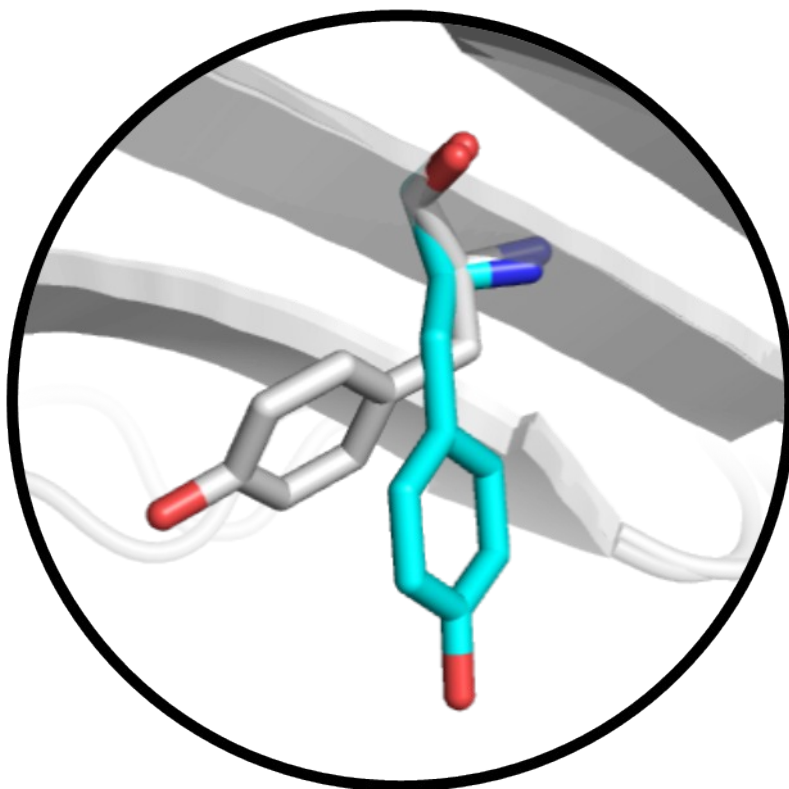

Figure 4 – Interaction between the ligand and the receptor. Each row represents the type of interaction and the columns represent the residues. Blue represent the residues in which there are a ligand/receptor interaction and white represents absence. (A) ligand 5J8O, (B) ligand 5J89 (C) ligand 5N2D (D) ligand 5N2F (E) ligand 5NIU and (F) ligand 6R3K.

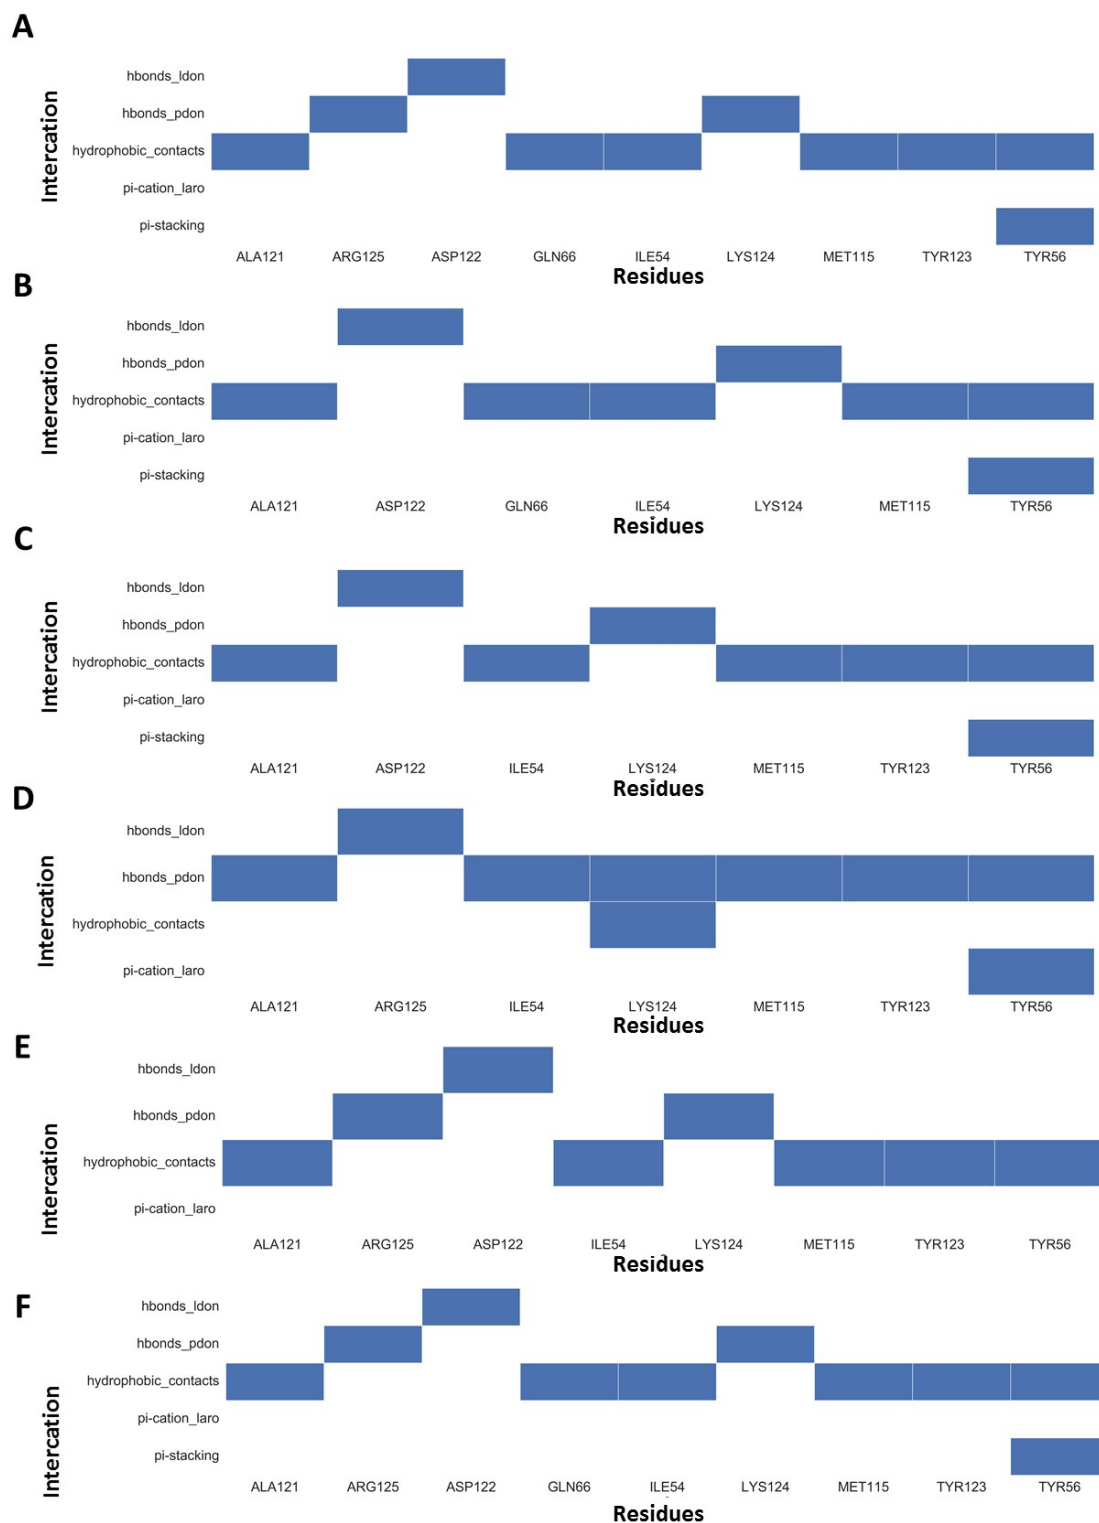

Figure 5 – Heat map of residues involved in PD-L1 homodimer stabilization among PD-L1 complex structures. (A) GoldScore, (B) ChemPLP, and (C) Chemscore.

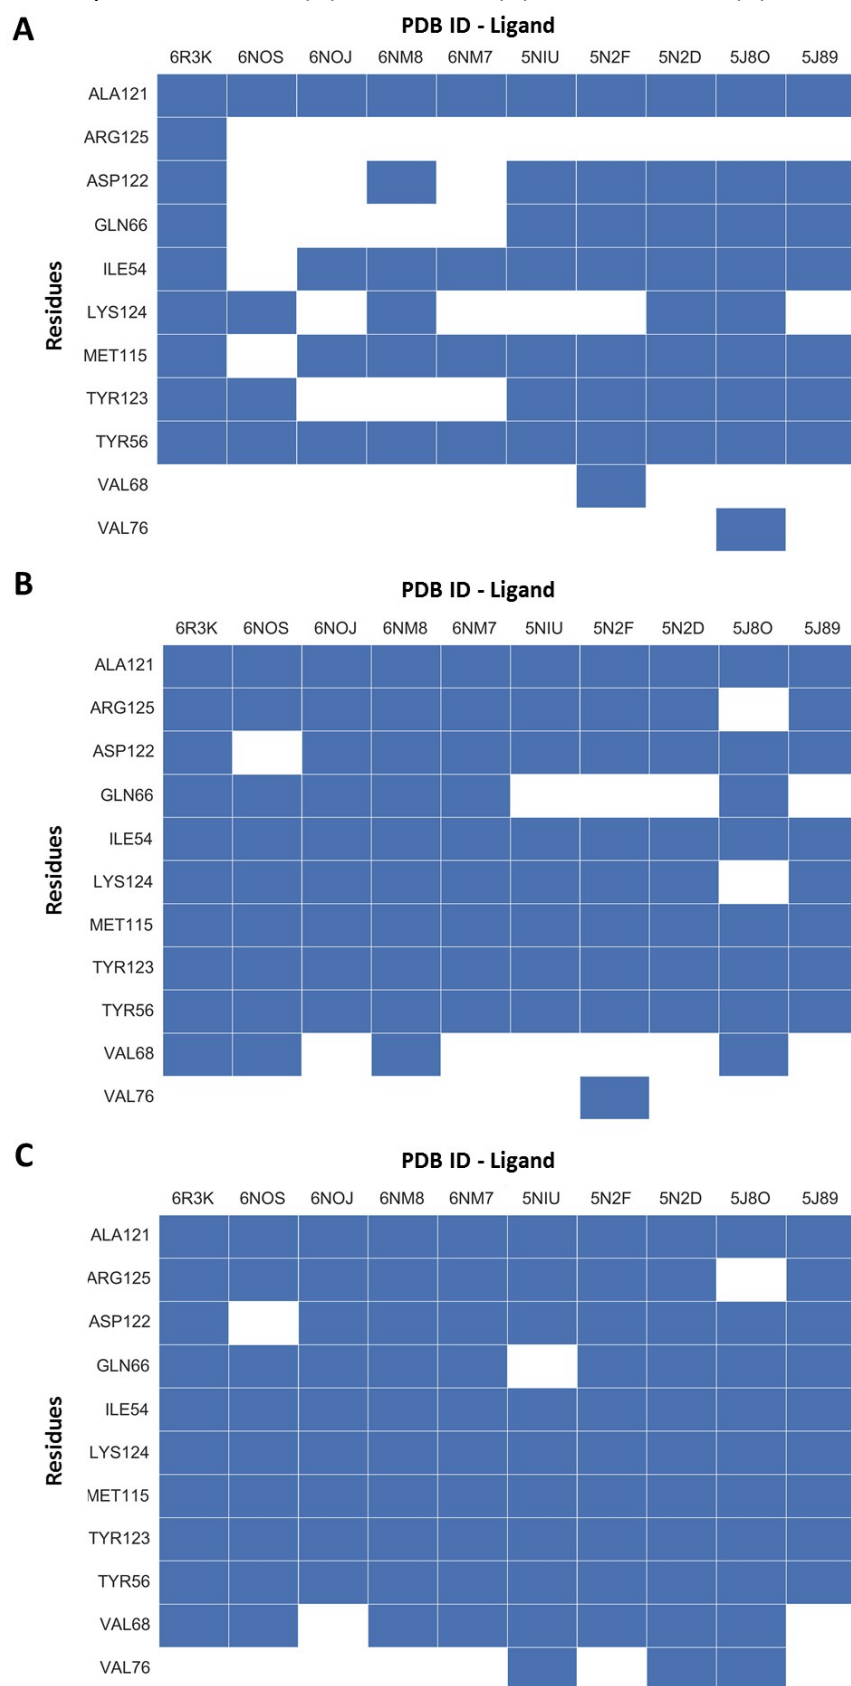

Figure 6 – Racking power of 5J89 and 6R3K for the best combination achieved (GOLD as docking program and GoldScore as scoring function). Score retrieved from docking solutions plotted against known IC<sub>50</sub> values.

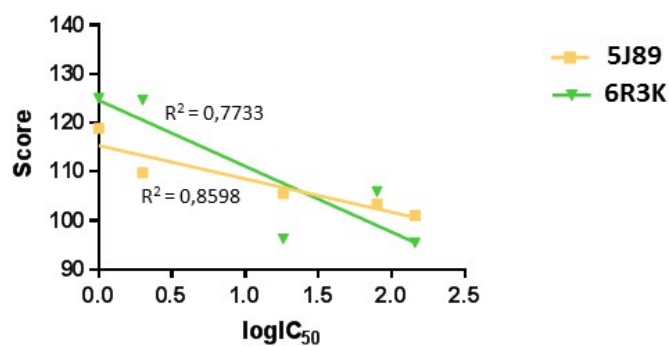

Figure 7 – 15 Å radius sphere around Tyr<sub>B</sub>56.

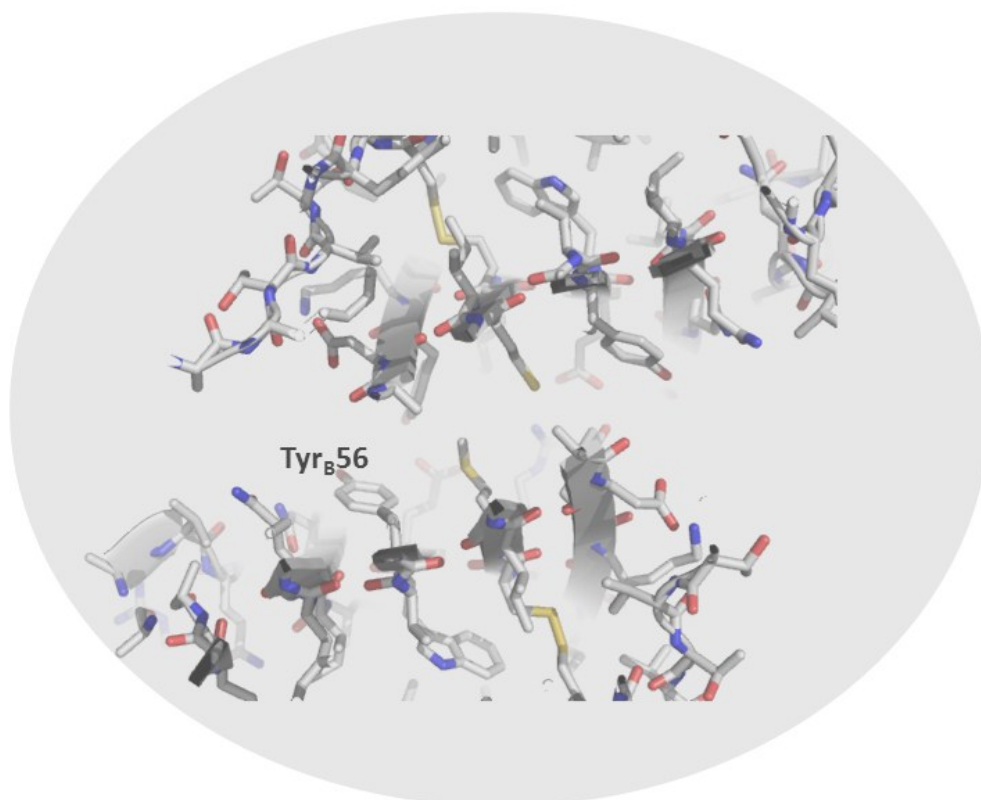

Supplement: c9md00326f1.pdf [file c9md00326f1.pdf]
